# Supplementary material for: Right Heart Pulmonary Circulation Unit Response to Exercise in Patients with Controlled Systemic Arterial Hypertension: Insights from the RIGHT Heart International NETwork (RIGHT-NET)
Source: MDPI journal article supplement (doi:10.3390/jcm11020451), 2022-01-17
Supplement: s1 [file s1]

**Supplementary Table S1.** Trend of hemodynamic parameters at baseline and at peak exercise in normotensive and hypertensive subjects

|             | Normotensives | Hypertensives | p        |
|-------------|---------------|---------------|----------|
| E/E'        | Baseline      | Baseline      | (T-Test) |
| All group   | 7.3±2.5       | 8.8±3.2       | 0.0001   |
| Group1      | 6.3±1.7       | 6.7±2.2       | 0.3      |
| Group2      | 7.2±2.3       | 8.5±3.2       | 0.026    |
| Group3      | 9.2±3.9       | 10.2±2.9      | 0.16     |
| E/E'        | Peak exercise | Peak exercise |          |
| All group   | 6.6±2.9       | 10.7±5.5      | 0.0001   |
| Group1      | 7.1±2.3       | 7.5±2.1       | 0.4      |
| Group2      | 6.2±3.4       | 9.7±6.4       | 0.004    |
| Group3      | 6.2±3         | 13±4.6        | 0.0001   |
| PASP (mmHg) | Baseline      | Baseline      |          |
| All group   | 22±3.0        | 25±7          | 0.0001   |
| Group1      | 20.7±5.1      | 22.2±4.5      | 0.2      |
| Group2      | 22.8±4.5      | 24.2±5.7      | 0.17     |
| Group3      | 23.9±5.8      | 26.5±8.1      | 0.08     |
| PASP (mmHg) | Peak          | Peak          |          |
| All group   | 35.4±9.4      | 47.3±13.9     | 0.0001   |
| Group1      | 32.5±7        | 52.5±16.7     | 0.0001   |
| Group2      | 35.0±8.1      | 43.3±13.6     | 0.0001   |
| Group3      | 40.7±11.9     | 49.2±11.8     | 0.001    |
| CO (L/min)  | Baseline      | Baseline      |          |
| All group   | 5.1±1.4       | 5.1±1.7       | 0.7      |
| Group1      | 5.3±1.4       | 4.8±1.6       | 0.1      |
| Group2      | 4.9±1.5       | 5.4±1.7       | 0.1      |
| Group3      | 4.9±1.3       | 5±1.7         | 0.8      |
| CO (L/min)  | Peak          | Peak          |          |
| All group   | 12.2±3.1      | 10.7±3.6      | 0.0001   |
| Group1      | 13±2.7        | 12.3±3.6      | 0.3      |
| Group2      | 12.3±3        | 11.3±3.4      | 0.1      |
| Group3      | 11.0±3.4      | 9.3±3.5       | 0.02     |
| TAPSE       | Baseline      | Baseline      |          |
| All group   | 22.9±3.1      | 23±3.7        | 0.9      |
| Group1      | 23.2±2.8      | 23.5±3.7      | 0.7      |
| Group2      | 22.8±3.3      | 23.02±3.2     | 0.7      |
| Group3      | 22.5±3.4      | 22.7±4.2      | 0.8      |
| TAPSE       | Peak          | Peak          |          |
| All group   | 28.4±3.5      | 28.4±5.2      | 0.8      |
| Group1      | 27.8±3.3      | 32±5.4        | 0.0001   |
| Group2      | 28.9±2.9      | 28.3±4.8      | 0.4      |

|            |                 |                 |        |
|------------|-----------------|-----------------|--------|
| Group3     | 28.8±4.4        | 26.8±4.7        | 0.053  |
| TAPSE/PASP | <b>Baseline</b> | <b>Baseline</b> |        |
| All group  | 1.16±0.4        | 1.06±0.3        | 0.04   |
| Group1     | 1.25±0.5        | 1.14±0.3        | 0.3    |
| Group2     | 1.07±0.3        | 1.07±0.3        | 0.9    |
| Group3     | 1.1±0.4         | 1.02±0.39       | 0.8    |
| TAPSE/PASP | <b>Peak</b>     | <b>Peak</b>     |        |
| All group  | 0.94±0.29       | 0.65±0.21       | 0.0001 |
| Group1     | 1.0±0.25        | 0.66±0.18       | 0.0001 |
| Group2     | 0.95±0.21       | 0.71±0.22       | 0.0001 |
| Group3     | 0.83±0.38       | 0.55±0.18       | 0.0001 |

Abbreviations: CO, left ventricular cardiac output; HT, hypertension; PASP, pulmonary arterial systolic pressure; TAPSE, tricuspid annular systolic excursion; TAPSE/PASP, tricuspid annular systolic excursion/pulmonary arterial systolic pressure.
